# Supplementary material for: Systematic exploration of a rutile-type zinc(ii)–phosphonocarboxylate open framework: the factors that influence the structure
Source: Royal Society of Chemistry journal article supplement (doi:10.1039/c0dt00525h), 2010-01-01

Electronic Supporting Information for:

**Systematic exploration of a rutile-type zinc(II)-phosphonocarboxylate open  
framework: the factors that influence the structure**

Yun Ling,<sup>a,b</sup> Teng-Biao Liao,<sup>a</sup> Zhen-Xia Chen,<sup>a,b</sup> Lin-Hong Weng<sup>a</sup> Ya-Ming Zhou\*<sup>a</sup>

<sup>a</sup> Shanghai Key Laboratory of Molecular Catalysis and Innovative Materials, Department of Chemistry and Advanced Material Laboratory, Fudan University, Shanghai (200433), China

Fax: (+)86 21 65643925

E-mail: [ymzhou@fudan.edu.cn](mailto:ymzhou@fudan.edu.cn)

<sup>b</sup> Laboratory of Advanced Materials, Fudan University, Shanghai (200433), China

Table S1. Crystallographic data for **1-8**

|                                                                                                       | <b>1</b>                                                                       | <b>2</b>                                                                        | <b>3</b>                                                                       | <b>4</b>                                                                        | <b>5</b>                                                                        | <b>6</b>                                                                                      | <b>7</b>                                                                                      | <b>8</b>                                                                        |
|-------------------------------------------------------------------------------------------------------|--------------------------------------------------------------------------------|---------------------------------------------------------------------------------|--------------------------------------------------------------------------------|---------------------------------------------------------------------------------|---------------------------------------------------------------------------------|-----------------------------------------------------------------------------------------------|-----------------------------------------------------------------------------------------------|---------------------------------------------------------------------------------|
| Formula                                                                                               | C <sub>16</sub> H <sub>24</sub> O <sub>24</sub> P <sub>2</sub> Zn <sub>5</sub> | C <sub>22</sub> H <sub>21</sub> P <sub>2</sub> O <sub>19</sub> NZn <sub>3</sub> | C <sub>16</sub> H <sub>12</sub> O <sub>16</sub> P <sub>2</sub> Zn <sub>3</sub> | C <sub>18</sub> H <sub>19</sub> O <sub>16</sub> P <sub>2</sub> NZn <sub>3</sub> | C <sub>14</sub> H <sub>27</sub> N <sub>4</sub> O <sub>10</sub> PZn <sub>2</sub> | C <sub>22</sub> H <sub>32</sub> N <sub>4</sub> O <sub>16</sub> P <sub>2</sub> Zn <sub>3</sub> | C <sub>40</sub> H <sub>54</sub> O <sub>37</sub> N <sub>4</sub> P <sub>4</sub> Zn <sub>5</sub> | C <sub>20</sub> H <sub>27</sub> NO <sub>19</sub> P <sub>2</sub> Zn <sub>3</sub> |
| F.W.                                                                                                  | 989.14                                                                         | 861.45                                                                          | 718.31                                                                         | 763.39                                                                          | 573.11                                                                          | 866.57                                                                                        | 1633.66                                                                                       | 843.51                                                                          |
| Space group                                                                                           | <i>P</i> -1                                                                    | <i>Pbca</i>                                                                     | <i>I</i> -42 <i>d</i>                                                          | <i>C</i> 2/ <i>c</i>                                                            | <i>P</i> 2 <sub>1</sub> / <i>c</i>                                              | <i>C</i> 2/ <i>c</i>                                                                          | <i>C</i> 2/ <i>c</i>                                                                          | <i>I</i> -42 <i>d</i>                                                           |
| <i>a</i> (Å)                                                                                          | 7.419(3)                                                                       | 13.707(5)                                                                       | 18.310(6)                                                                      | 26.918(12)                                                                      | 9.866(3)                                                                        | 32.84(2)                                                                                      | 28.54(2)                                                                                      | 18.450(4)                                                                       |
| <i>b</i> (Å)                                                                                          | 9.969(3)                                                                       | 17.121(7)                                                                       | 18.310(6)                                                                      | 9.920(5)                                                                        | 15.449(5)                                                                       | 9.599(7)                                                                                      | 12.983(7)                                                                                     | 18.450(4)                                                                       |
| <i>c</i> (Å)                                                                                          | 11.148(4)                                                                      | 36.018(14)                                                                      | 23.222(11)                                                                     | 10.161(5)                                                                       | 17.097(4)                                                                       | 20.209(13)                                                                                    | 15.834(9)                                                                                     | 23.201(7)                                                                       |
| $\alpha$ (°)                                                                                          | 65.152(4)                                                                      | 90                                                                              | 90                                                                             | 90                                                                              | 90                                                                              | 90                                                                                            | 90                                                                                            | 90                                                                              |
| $\beta$ (°)                                                                                           | 76.109(4)                                                                      | 90                                                                              | 90                                                                             | 112.179(6)                                                                      | 125.244(12)                                                                     | 106.710(9)                                                                                    | 106.104(13)                                                                                   | 90                                                                              |
| $\gamma$ (°)                                                                                          | 69.965(4)                                                                      | 90                                                                              | 90                                                                             | 90                                                                              | 90                                                                              | 90                                                                                            | 90                                                                                            | 90                                                                              |
| <i>V</i> (Å <sup>3</sup> )                                                                            | 698.4(4)                                                                       | 8453(6)                                                                         | 7785(5)                                                                        | 2513(2)                                                                         | 2128.3(11)                                                                      | 6102(7)                                                                                       | 5637(6)                                                                                       | 7898(3)                                                                         |
| <i>Z</i>                                                                                              | 1                                                                              | 8                                                                               | 8                                                                              | 4                                                                               | 4                                                                               | 8                                                                                             | 4                                                                                             | 8                                                                               |
| <i>D</i> <sub>c</sub> (g cm <sup>-3</sup> )                                                           | 2.352                                                                          | 1.354                                                                           | 1.226                                                                          | 1.983                                                                           | 1.789                                                                           | 1.887                                                                                         | 1.904                                                                                         | 1.400                                                                           |
| $\mu$ (mm <sup>-1</sup> )                                                                             | 4.453                                                                          | 1.827                                                                           | 1.964                                                                          | 3.048                                                                           | 2.389                                                                           | 2.527                                                                                         | 2.321                                                                                         | 1.953                                                                           |
| <i>F</i> (000)                                                                                        | 492                                                                            | 3456                                                                            | 2848                                                                           | 1528                                                                            | 1176                                                                            | 3520                                                                                          | 3296                                                                                          | 3384                                                                            |
| <i>T</i> (K)                                                                                          | 293                                                                            | 293                                                                             | 293                                                                            | 293                                                                             | 293                                                                             | 293                                                                                           | 293                                                                                           | 293                                                                             |
| Total collected                                                                                       | 2946                                                                           | 33683                                                                           | 18703                                                                          | 4588                                                                            | 8819                                                                            | 12544                                                                                         | 11544                                                                                         | 16453                                                                           |
| Unique data, <i>R</i> (int)                                                                           | 2458                                                                           | 7578, 0.117                                                                     | 3484, 0.0527                                                                   | 2224, 0.059                                                                     | 3815, 0.089                                                                     | 5496, 0.075                                                                                   | 5047, 0.063                                                                                   | 3567, 0.159                                                                     |
| Observed [ <i>I</i> > 2σ( <i>I</i> )]                                                                 | 1866                                                                           | 3977                                                                            | 3079                                                                           | 1734                                                                            | 3021                                                                            | 3801                                                                                          | 3138                                                                                          | 2916                                                                            |
| GOF on <i>F</i> <sup>2</sup>                                                                          | 0.93                                                                           | 0.94                                                                            | 1.18                                                                           | 1.01                                                                            | 0.94                                                                            | 0.87                                                                                          | 0.87                                                                                          | 0.99                                                                            |
| <i>R</i> <sub>1</sub> , <sup>a</sup> <i>wR</i> <sub>2</sub> <sup>b</sup> [ <i>I</i> > 2σ( <i>I</i> )] | 0.0337, 0.0809                                                                 | 0.0596, 0.1990                                                                  | 0.0399, 0.1462                                                                 | 0.0403, 0.1028                                                                  | 0.0456, 0.1046                                                                  | 0.0370, 0.0739                                                                                | 0.0393, 0.0896                                                                                | 0.0558, 0.1426                                                                  |
| $\Delta\rho_{\max}/\Delta\rho_{\min}$ (e Å <sup>-3</sup> )                                            | -0.73, 0.61                                                                    | -0.59, 1.09                                                                     | 0.704, -0.493                                                                  | -0.75, 1.09                                                                     | -0.70, 0.89                                                                     | -0.49, 0.58                                                                                   | -0.50, 1.09                                                                                   | -1.09, 0.76                                                                     |
| CCDC                                                                                                  | 776920                                                                         | 751707                                                                          | 746203                                                                         | 776921                                                                          | 776922                                                                          | 776923                                                                                        | 776924                                                                                        | 776925                                                                          |

$$^a R_1 = \frac{\sum ||F_o| - |F_c||}{\sum |F_o|}, \quad ^b wR_2 = \left[ \frac{\sum w(F_o^2 - F_c^2)^2}{\sum w(F_o^2)^2} \right]^{1/2}$$

**Figure S1.** (a) the coordination geometry of Zn(II) ions in **1** (left) and the one dimensional inorganic chain (right) connected by phosphonate group; (b) the one dimensional chains further connected by tritopic pbdc ligands to generate the three dimensional structure of **1** (the phenyl group of pbdc has been reduced as 3-connected node, hydrogen atoms and lattice waters are omitted for clarity).

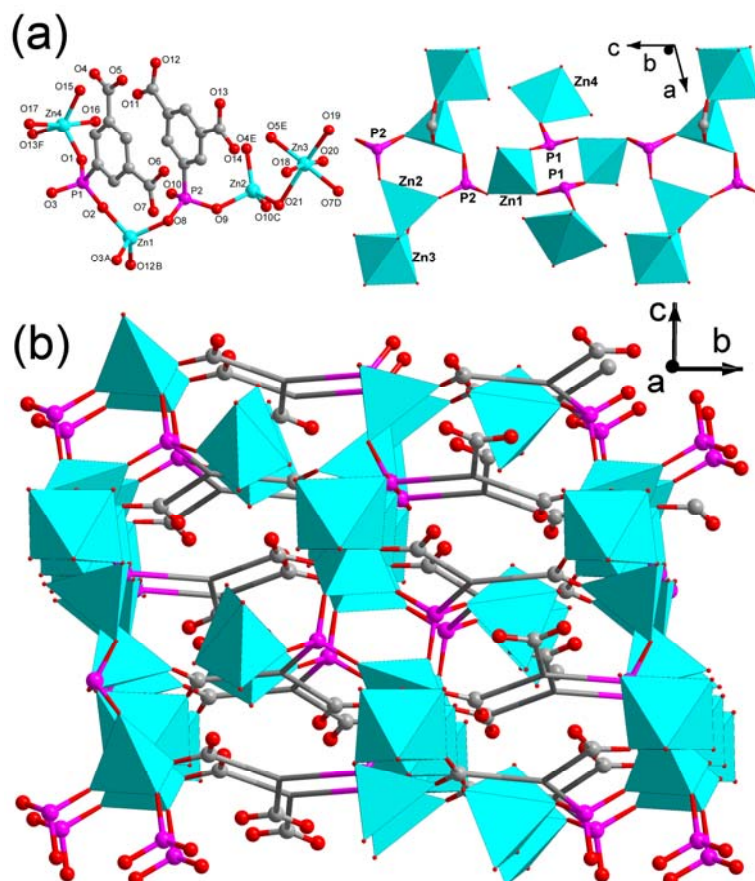

**Figure S2.** (a) the one dimensional inorganic chain of **4** generated by corner-shared connected tetrahedral Zn(II) ions and phosphonate groups; (b) the coordination model of pbdc in **4**; (c) the three dimensional structure of **4** (the phenyl group of pbdc has been reduced as 3-connected node, hydrogen atoms, protonated teta and water molecules plus lattice waters are omitted for clarity).

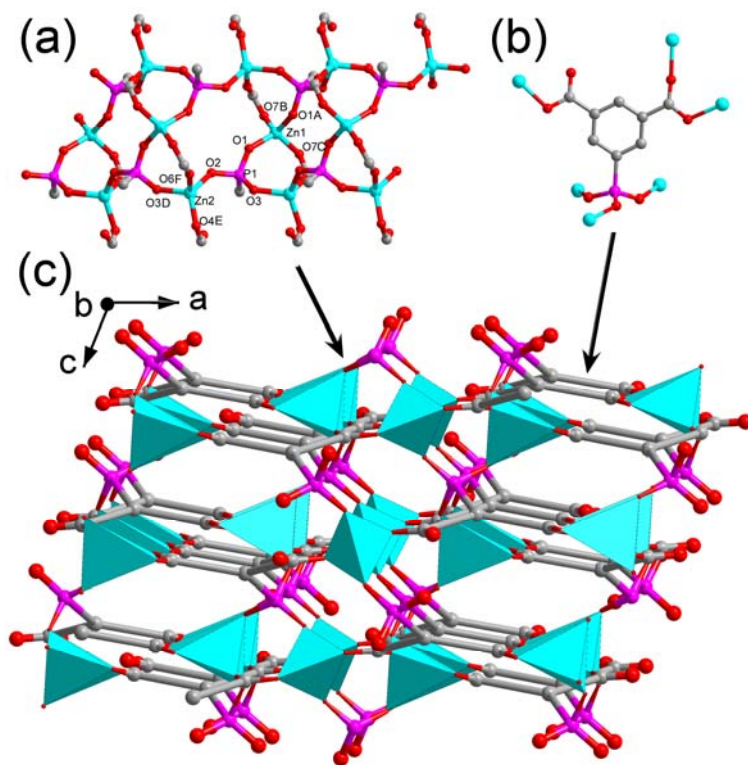

**Figure S3.** (a) the one-dimensional zigzag chain structure in **6**; (b) the coordination models of pbdc in **6**; (c) the three dimensional structure of **6** (the phenyl group of pbdc are reduced to the 3-connected node, hydrogen atoms and lattice waters are omitted for clarity)

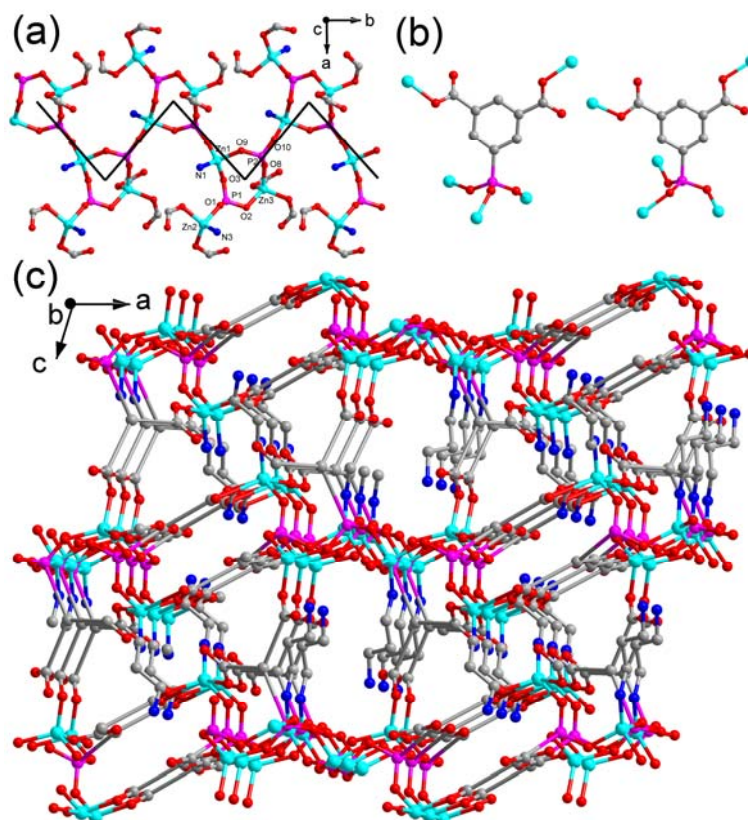

**Figure S4.** (a) the inorganic chain structure in structure **7**; (b) the coordination models of pbdc and Hpbdc ligands in structure **7**; (c) the three dimensional structure of **7** (the phenyl group of pbdc are reduced to the 3-connected node, hydrogen atoms and protonated *pz* plus lattice waters are omitted for clarity).

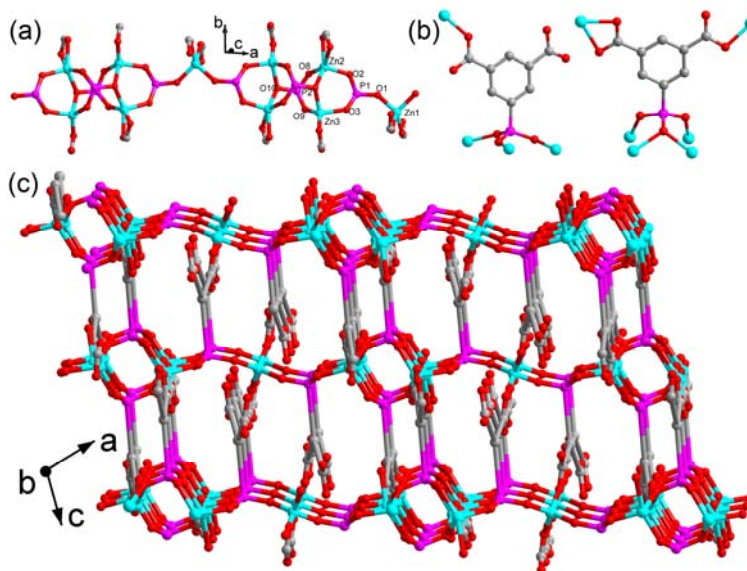

**Figure S5.** The TG curve of **8** (blue one) compared with that of **3** (black one).

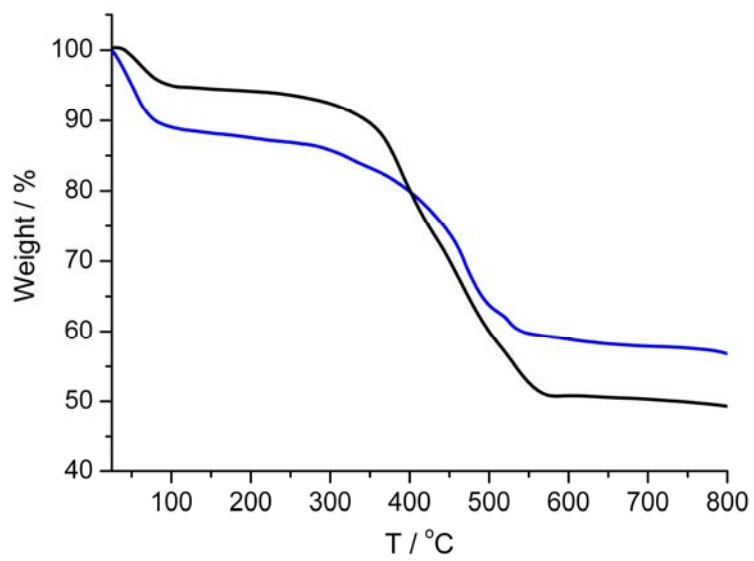

**Figure S6.** the PXRD data of **1** compared with simulated one.

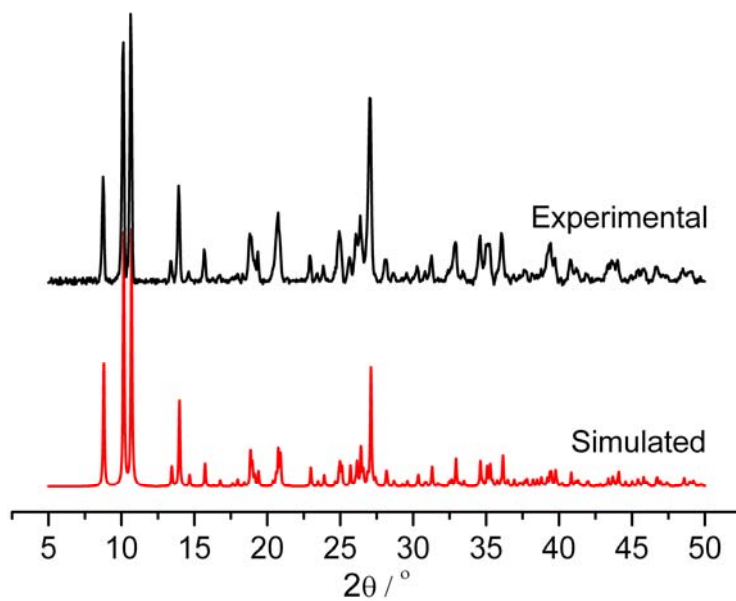



**Figure S7.** The PXRD data of **2** compared with simulated one.

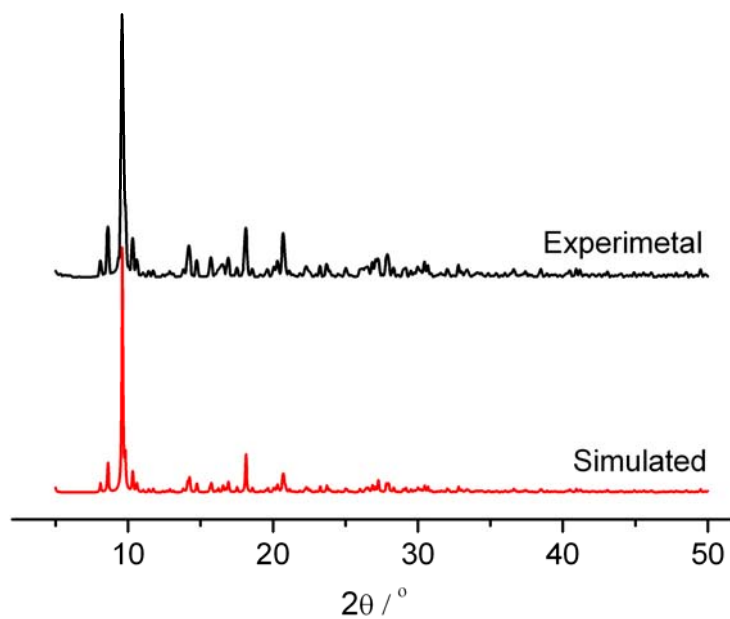

**Figures S8.** the PXRD data of **8** compared with simulated one.

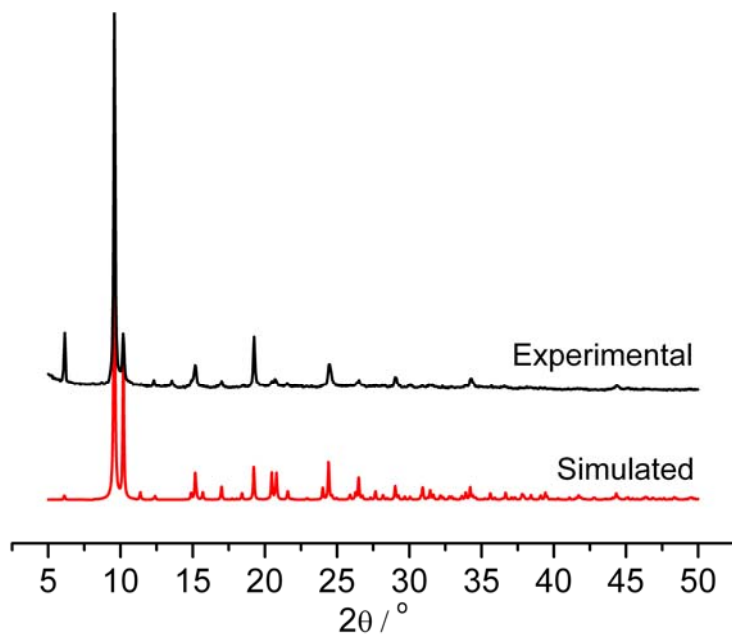

Supplement: c0dt00525h.pdf [file c0dt00525h.pdf]
